# Supplementary material
Source: MDPI journal article supplement (https://www.mdpi.com/2227-7102/13/10/978)
Supplement: s1 [file s1]

## Supplementary Material S1: Adaptation of the original questionnaire used in the study

This supplementary material shows the adapted version of the "Scale for the assessment of non-experts' AI literacy" (SNAIL) by Laupichler et al. [1] as used in this research project. While the adapted version has been translated into German to accommodate the native language of the AI course participants, we additionally added the original English items for international readers of this manuscript.

---

### [Online questionnaire page 1, German]

Liebe/r Studieninteressent/in,

Vielen Dank für Ihr Interesse an der Teilnahme an unserer Studie, die darauf abzielt, KI-Kurse mithilfe der "Scale for the assessment of non-experts' AI literacy" zu evaluieren.

Dies ist eine reine Selbsteinschätzung. Es gibt also keine richtigen oder falschen Antworten. Das Ausfüllen des Fragebogens dauert etwa 12 Minuten.

Neben den eigentlichen Aussagen werden Ihnen auch einige kurze Fragen zu Ihrer Person gestellt. Die Antworten auf diese Fragen sind wichtig für unsere Forschung.

Der Fragebogen ist anonym und Sie können an keiner Stelle identifiziert werden. Bitte antworten Sie daher so ehrlich wie möglich.

Bitte füllen Sie den Fragebogen alleine und ohne Unterbrechungen aus. Bitte beachten Sie, dass die Teilnahme nur für Personen ab 18 Jahren erlaubt ist.

Ihre Teilnahme an der Studie wird als Zustimmung zu den Teilnahmebedingungen betrachtet. Wenn Sie mit den Teilnahmebedingungen nicht einverstanden sind, starten Sie bitte nicht die Umfrage und schließen Sie den Fragebogen. Die detaillierten Teilnahmebedingungen finden Sie unten.

>> Click here to show terms of participation <<

Sind Sie mit den Teilnahmebedingungen und der Datenschutzrichtlinie einverstanden?

☐ Ich bin mit den Teilnahmebedingungen einverstanden.

☐ Ich bin NICHT mit den Teilnahmebedingungen einverstanden. (Bei Auswahl dieser Option wird die Seite geschlossen. Sie können den Fragebogen dann nicht ausfüllen).

### [Online questionnaire page 1, English translation]

Dear prospective participant,

Thank you for your interest in participating in our study, which aims to evaluate AI courses based on the "Scale for the assessment of non-experts' AI literacy".

This is purely a self-assessment. Thus, there are no right or wrong answers. Completing the questionnaire takes about 12 minutes.

In addition to the actual statements, there will be a few short questions about yourself. The answers to these questions are important for our research.

The questionnaire is anonymous and you cannot be identified at any point. Therefore, please answer as honestly as possible.

Please complete the questionnaire alone and in one go. Note that participation is only permitted for individuals 18 years and older.

| I can describe how machine learning models are trained, validated, and tested. |                     |   |   |   |   |                  |
|--------------------------------------------------------------------------------|---------------------|---|---|---|---|------------------|
|                                                                                | 1 Strongly disagree |   |   |   |   | 6 Strongly agree |
| - current self-assessment                                                      | O                   | O | O | O | O | O                |
| - retrospective self-assessment at                                             | O                   | O | O | O | O | O                |

|                                |  |  |  |  |  |  |
|--------------------------------|--|--|--|--|--|--|
| the beginning<br>of the course |  |  |  |  |  |  |
|--------------------------------|--|--|--|--|--|--|

[All items used in the AI literacy part of the study, with English translation]

| <b>Factor 1 (Technical Understanding)</b><br><br>English<br><br>I can...                                                     | <b>Faktor 1 (Technisches Verständnis)</b><br><br>German (as used in this study)<br><br>Ich kann...                      |
|------------------------------------------------------------------------------------------------------------------------------|-------------------------------------------------------------------------------------------------------------------------|
| describe how machine learning models are trained, validated, and tested. (V14)                                               | beschreiben, wie Machine Learning Modelle trainiert, validiert und getestet werden.                                     |
| explain how deep learning relates to machine learning (V17)                                                                  | erklären, in welchem Verhältnis Deep Learning zu Machine Learning steht.                                                |
| explain how rule-based systems differ from machine learning systems. (V30)                                                   | erklären, wie sich regelbasierte Systeme von Machine Learning Systemen unterscheiden.                                   |
| explain how AI applications make decisions. (V12)                                                                            | erklären, wie KI Anwendungen Entscheidungen treffen.                                                                    |
| explain how 'reinforcement learning' works on a basic level (in the context of machine learning). (V16)                      | erklären, wie "Reinforcement Learning" im Wesentlichen funktioniert (im Kontext von Machine Learning).                  |
| explain the difference between general (or strong) and narrow (or weak) artificial intelligence. (V04)                       | den Unterschied zwischen genereller (oder starker) und enger (oder schwacher) künstlicher Intelligenz erklären.         |
| explain how sensors are used by computers to collect data that can be used for AI purposes. (V23)                            | erklären, wie Sensoren von Computern verwendet werden, um Daten zu sammeln, welche für KI-Zwecke genutzt werden können. |
| explain what the term 'artificial neural network' means. (V18)                                                               | erklären, was der Begriff "künstliches neuronales Netz" bedeutet.                                                       |
| explain how machine learning works at a general level. (V13)                                                                 | erklären, wie Machine Learning generell funktioniert.                                                                   |
| explain the difference between 'supervised learning' and 'unsupervised learning' (in the context of machine learning). (V15) | den Unterschied zwischen "Supervised Learning" und "Unsupervised Learning" erklären (im Kontext von Machine Learning).  |

|                                                                                                                                            |                                                                                                                                               |
|--------------------------------------------------------------------------------------------------------------------------------------------|-----------------------------------------------------------------------------------------------------------------------------------------------|
| describe the concept of explainable AI. (V33)                                                                                              | das Konzept der erklärbaren KI beschreiben.                                                                                                   |
| describe how some artificial intelligence systems can act in their environment and react to their environment. (V22)                       | beschreiben, wie einige Systeme künstlicher Intelligenz in ihrer Umgebung handeln und auf ihre Umgebung reagieren können.                     |
| describe the concept of big data. (V36)                                                                                                    | das Konzept von Big Data beschreiben.                                                                                                         |
| evaluate whether media representations of AI (e.g., in movies or video games) go beyond the current capabilities of AI technologies. (V05) | bewerten, ob Darstellungen von KI in den Medien (z.B. in Filmen oder Videospielen) die aktuellen Fähigkeiten von KI-Technologien übersteigen. |
| <b>Factor 2 (Critical Appraisal)</b><br><br>English<br><br>I can...                                                                        | <b>Faktor 2 (Kritische Beurteilung)</b><br><br>German (as used in this study)<br><br>Ich kann...                                              |
| explain why data privacy must be considered when developing and using artificial intelligence applications. (V35)                          | erklären, warum Datenschutz beachtet werden muss, wenn Anwendungen künstlicher Intelligenz entwickelt und verwendet werden.                   |
| explain why data security must be considered when developing and using artificial intelligence applications. (V34)                         | erklären, warum Datensicherheit beachtet werden muss, wenn Anwendungen künstlicher Intelligenz entwickelt und verwendet werden.               |
| identify ethical issues surrounding artificial intelligence. (V25)                                                                         | ethische Bedenken rund um künstliche Intelligenz identifizieren.                                                                              |
| describe risks that may arise when using artificial intelligence systems. (V08)                                                            | Risiken beschreiben, welche auftreten können, wenn Systeme künstlicher Intelligenz verwendet werden.                                          |
| name weaknesses of artificial intelligence. (V06)                                                                                          | Schwächen von künstlicher Intelligenz nennen.                                                                                                 |
| describe potential legal problems that may arise when using artificial intelligence. (V39)                                                 | potentielle rechtliche Probleme beschreiben, welche entstehen können, wenn künstliche Intelligenz genutzt wird.                               |
| critically reflect on the potential impact of artificial intelligence on individuals and society. (V28)                                    | den potentiellen Einfluss von künstlicher Intelligenz auf Individuen und die Gesellschaft kritisch reflektieren.                              |

|                                                                                                                             |                                                                                                                                       |
|-----------------------------------------------------------------------------------------------------------------------------|---------------------------------------------------------------------------------------------------------------------------------------|
| describe why humans play an important role in the development of artificial intelligence systems. (V21)                     | beschreiben, warum Menschen eine wichtige Rolle bei der Entwicklung von Systemen künstlicher Intelligenz spielen.                     |
| explain why data plays an important role in the development and application of artificial intelligence. (V20)               | erklären, warum Daten eine wichtige Rolle bei der Entwicklung und Anwendung künstlicher Intelligenz spielen.                          |
| describe what artificial intelligence is. (V32)                                                                             | beschreiben, was künstliche Intelligenz ist.                                                                                          |
| <b>Factor 3 (Practical Application)</b><br><br>English<br><br>I can...                                                      | <b>Faktor 3 (Praktische Anwendung)</b><br><br>German (as used in this study)<br><br>Ich kann...                                       |
| give examples from my daily life (personal or professional) where I might be in contact with artificial intelligence. (V37) | Beispiele aus meinem täglichen Leben (privat oder beruflich) geben, bei denen ich in Kontakt mit künstlicher Intelligenz sein könnte. |
| name examples of technical applications that are supported by artificial intelligence. (V02)                                | Beispiele technischer Anwendungen nennen, die von künstlicher Intelligenz unterstützt werden.                                         |
| tell if the technologies I use are supported by artificial intelligence. (V01)                                              | erkennen, ob die Technologien, die ich nutze, von künstlicher Intelligenz unterstützt werden.                                         |
| assess if a problem in my field can and should be solved with artificial intelligence methods. (V31)                        | beurteilen, ob ein Problem in meinem Fachbereich mit Methoden der künstlichen Intelligenz gelöst werden kann und sollte.              |
| name applications in which AI-assisted natural language processing/understanding is used. (V24)                             | Anwendungen nennen, bei denen KI-unterstütztes Natural Language Processing/Understanding genutzt wird.                                |
| explain why AI has recently become increasingly important. (V29)                                                            | erklären, warum KI in letzter Zeit zunehmend wichtiger geworden ist.                                                                  |
| critically evaluate the implications of artificial intelligence applications in at least one subject area. (V19)            | die Auswirkungen von Anwendungen der künstlichen Intelligenz in mindestens einem Themenbereich kritisch bewerten.                     |

Im Folgenden finden Sie fünf Aussagen, die sich auf Ihre persönliche Einstellung gegenüber künstlicher Intelligenz beziehen. Bitte geben Sie an, inwieweit Sie den Aussagen zustimmen. Die Frage bezieht sich nur auf Ihre Einstellungen gegenüber KI heute (d. h. am Ende des Kurses).

Wie bereits erwähnt geht es um Ihre individuelle Einstellung. Daher gibt es keine richtigen oder falschen Antworten.

|                                                                        | Stimme überhaupt nicht zu |                       |                       |                       |                       | Stimme voll und ganz zu |
|------------------------------------------------------------------------|---------------------------|-----------------------|-----------------------|-----------------------|-----------------------|-------------------------|
| Ich habe Angst vor künstlicher Intelligenz.                            | <input type="radio"/>     | <input type="radio"/> | <input type="radio"/> | <input type="radio"/> | <input type="radio"/> | <input type="radio"/>   |
| Ich vertraue künstlicher Intelligenz.                                  | <input type="radio"/>     | <input type="radio"/> | <input type="radio"/> | <input type="radio"/> | <input type="radio"/> | <input type="radio"/>   |
| Künstliche Intelligenz wird die Menschheit zerstören.                  | <input type="radio"/>     | <input type="radio"/> | <input type="radio"/> | <input type="radio"/> | <input type="radio"/> | <input type="radio"/>   |
| Künstliche Intelligenz wird eine Bereicherung für die Menschheit sein. | <input type="radio"/>     | <input type="radio"/> | <input type="radio"/> | <input type="radio"/> | <input type="radio"/> | <input type="radio"/>   |
| Künstliche Intelligenz wird für viel Arbeitslosigkeit sorgen.          | <input type="radio"/>     | <input type="radio"/> | <input type="radio"/> | <input type="radio"/> | <input type="radio"/> | <input type="radio"/>   |

[Online questionnaire page 5, English translation]

Below are five statements that relate to your personal attitudes toward artificial intelligence. Please indicate the extent to which you agree with the statements. The question is only about your attitude towards AI today (i.e., at the end of the course).

As mentioned, it is about your individual attitudes. Consequently, there are no right or wrong answers.

|                                                     | Strongly disagree     |                       |                       |                       |                       | Strongly agree        |
|-----------------------------------------------------|-----------------------|-----------------------|-----------------------|-----------------------|-----------------------|-----------------------|
| I fear artificial intelligence.                     | <input type="radio"/> |
| I trust artificial intelligence.                    | <input type="radio"/> |
| Artificial intelligence will destroy humankind.     | <input type="radio"/> |
| Artificial intelligence will benefit humankind.     | <input type="radio"/> |
| Artificial intelligence will cause many job losses. | <input type="radio"/> |

[Online questionnaire page 6, German]

1. Welches Fach studieren Sie?

Bitte geben Sie Ihr Hauptstudienfach an. Wenn Sie mehr als ein Fach gleichzeitig studieren, geben Sie bitte das Fach an, das am meisten mit dem Inhalt des Kurses zu tun hat.

2. In welchem Semester sind Sie?

Bitte geben Sie das Fachsemester an, in welchem Sie sich zurzeit befinden. Wir interessieren uns für die Gesamtzahl der Semester, in denen Sie an einer Hochschule eingeschrieben waren.

3. Wie alt sind Sie?

Bitte geben Sie Ihr Alter als ganze Zahl an, d. h. „25“, wenn Sie fünfundzwanzig Jahre alt sind.

(Hinweis: Sie können nur Zahlen eingeben)

4. Mit welcher Geschlechtsidentität identifizieren Sie sich am meisten?

☐ Weiblich

☐ Männlich

☐ Andere, und zwar:

☐ Ich kann / will diese Frage nicht beantworten

5. Haben Sie bereits KI-Kurse besucht/abgeschlossen?

Bitte geben Sie an, ob Sie bereits KI-Kurse besucht haben und wenn ja, wie umfangreich diese Kurse waren. Dabei ist es unerheblich, ob die Kurse im Rahmen Ihres Studiums oder außerhalb Ihres Studiums (z.B. Online-Kurse, Schule, etc.) stattgefunden haben.

☐ Vor der heute evaluierten Lehrveranstaltung habe ich noch nie einen Kurs zu KI besucht.

☐ Neben der heute evaluierten Lehrveranstaltung habe ich bereits Kurse besucht, die einen Arbeitsaufwand von ca. 1 bis 30 Stunden (bzw. max. 1 ECTS-Punkt) hatten.

☐ Neben der heute evaluierten Lehrveranstaltung habe ich bereits Kurse besucht, die einen Arbeitsaufwand von ca. 31 bis 120 Stunden (bzw. max. 4 ECTS-Punkte) hatten.

☐ Neben der heute evaluierten Lehrveranstaltung habe ich bereits Kurse besucht, die einen Arbeitsaufwand von mehr als 120 Stunden (bzw. mehr als 4 ECTS-Punkte) hatten.

6. Inwieweit nutzen Sie andere Möglichkeiten, um sich über KI zu informieren?

Bitte geben Sie an, inwieweit Sie sich bereits außerhalb von KI-Kursen über das Themengebiet KI informiert haben.

Zu den Möglichkeiten, sich außerhalb von Kursen über KI zu informieren, gehören Bücher über KI, YouTube-Videos, Nachrichtenartikel, Beiträge in sozialen Medien usw.

☐ Außerhalb von KI-Kursen nutze ich keine anderen Möglichkeiten/Medien, um etwas über KI zu lernen.

☐ Außerhalb von KI-Kursen nutze ich nur unregelmäßig andere Möglichkeiten/Medien, um mich über KI zu informieren.

☐ Außerhalb von KI-Kursen nutze ich ziemlich regelmäßig andere Möglichkeiten/Medien, um mich über KI zu informieren.

☐ Außerhalb von KI-Kursen bilde ich mich mit anderen Möglichkeiten/Medien sehr detailliert über KI fort.

[Online questionnaire page 6, English translation]

1. What subject are you studying?

Please indicate your primary field of study. If you are studying more than one subject at the same time, please indicate the subject that is most related to the content of the course.

2. What semester are you in?

Please indicate the semester in which you are currently studying. We are interested in the total number of semesters in which you were enrolled at a university.

(Note: You can only enter numbers)

3. What is your age?

Please indicate your age as an integer, i.e. "25" if you are twenty-five years old.

(Note: You can only enter numbers)

4. To which gender identity do you most identify?

☐ Female

☐ Male

☐ Other, namely:

☐ I cannot / do not want to answer this question.

5. Have you already attended/completed AI courses?

Please indicate whether you have already attended AI courses and, and if so, how extensive those courses were. It is irrelevant whether the courses took place within the scope of your studies or outside of your studies (e.g. online courses, school, etc.).

☐ Prior to the course evaluated today, I have never taken a course on AI.

☐ In addition to the course evaluated today, I have already attended courses that had a workload of approximately 1 to 30 hours (or max. 1 ECTS points).

☐ In addition to the course evaluated today, I have already attended courses that had a workload of approximately 31 to 120 hours (or max. 4 ECTS points).

☐ In addition to the course evaluated today, I have already attended courses that had a workload of more than 120 hours (or more than 4 ECTS points).

6. To what extent do you use other means to learn about AI?

Please indicate to what extent you have already educated yourself about the subject area of AI outside of AI courses. Opportunities for AI education outside of actual courses would include books about AI, YouTube videos, news articles, social media posts, etc.

☐ Outside of AI courses, I do not use any other opportunities/media to learn about AI.

☐ Outside of AI courses, I only use other opportunities/media to learn about AI on an irregular basis.

☐ Outside of AI courses, I use other opportunities/media to learn about AI fairly regularly.

☐ Outside of AI courses, I educate myself on AI in great detail using other opportunities/media.
